# Supplementary material
Source: publisher site journal article supplement (https://www.spandidos-publications.com/8562/downloadSupplementary)

Figure S1. Expression of ALG3, MAN1A1 and MAN1C1 in lung cancer and normal lung tissues (box plots). (A) Lung ADC (tumor n=515, normal n=59). (B) Lung SQC (tumor n=503, normal n=59). Values are in transcripts per million from The Cancer Genome Atlas, as displayed in UALCAN. ADC, adenocarcinoma; ALG3,  $\alpha$ -1,3-mannosyltransferase; MAN1A1, mannosidase  $\alpha$  class 1A member 1; MAN1C1, mannosidase  $\alpha$  class 1C member 1; SQC, squamous cell carcinoma.

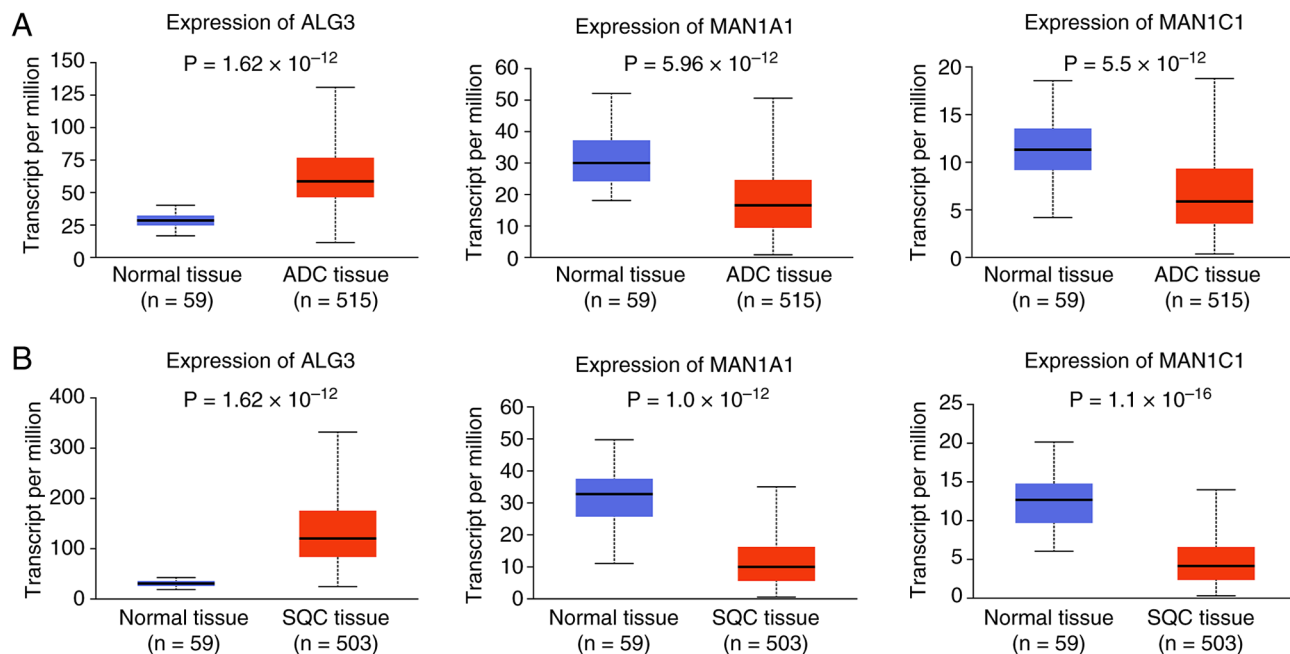

Figure S2. Expression of MGAT1 and MGAT3 in lung cancer and normal lung tissues (box plots). (A) Lung ADC (tumor n=515, normal n=59). (B) Lung SQC (tumor n=503, normal n=59). Values are transcripts per million from The Cancer Genome Atlas, as displayed in UALCAN. ADC, adenocarcinoma; MGAT1,  $\alpha$ -1,3-mannosyl-glycoprotein 2- $\beta$ -N-acetylglucosaminyltransferase; MGAT3,  $\beta$ -1,4-mannosyl-glycoprotein 4- $\beta$ -N-acetylglucosaminyltransferase; SQC, squamous cell carcinoma.

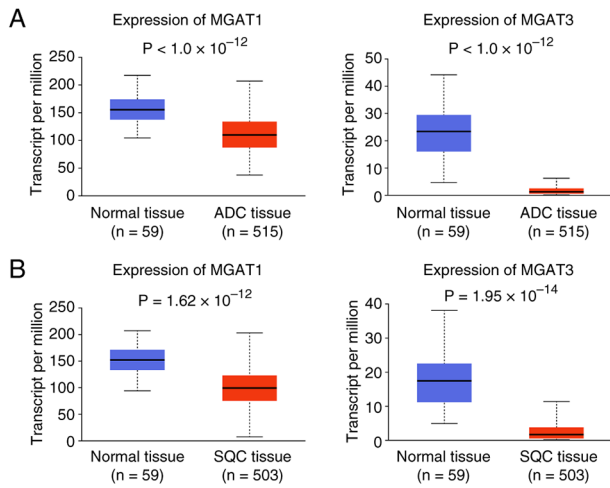

Supplement: Supplementary file 1 [file downloadSupplementary]
